# Supplementary material for: Ankylosing spondylitis and mortality following hospitalised pneumonia: a population-based cohort study
Source: PubMed Central journal article supplement — RMD Open. 2020 Feb 6;6(1):e001140. doi: 10.1136/rmdopen-2019-001140 (PMC7046963; doi:10.1136/rmdopen-2019-001140), 2020-02-06
Supplement: rmdopen-2019-001140supp001.pdf [file rmdopen-2019-001140supp001.pdf]

**List of ICD codes used in this study**

Codes for Ankylosing Spondylitis: ICD-8 code: 712.4, ICD-10 code: M45\*

Codes for pneumonia ICD10: J12.x-J18.x, A481x, A709.x

ICD-10 codes for complication:

Empyema: DJ86

Pulmonary embolism: DI26

Pulmonary abscess: DJ85

**AS AND MORTALITY OF PNEUMONIA**
